# Supplementary material for: The role of Phe150 in human voltage-gated proton channel
Source: PubMed Central journal article supplement — iScience. 2022 Oct 20;25(11):105420. doi: 10.1016/j.isci.2022.105420 (PMC9646954; doi:10.1016/j.isci.2022.105420), 2022-10-20
Supplement: mmc1.pdf [file mmc1.pdf]

**iScience, Volume 25**

**Supplemental information**

**The role of Phe150 in human  
voltage-gated proton channel**

**Xin Wu, Lu Zhang, and Liang Hong**

## **SUPPLEMENTARY INFORMATION**

The role of Phe150 in human voltage-gated proton channel

Xin Wu, Lu Zhang, Liang Hong

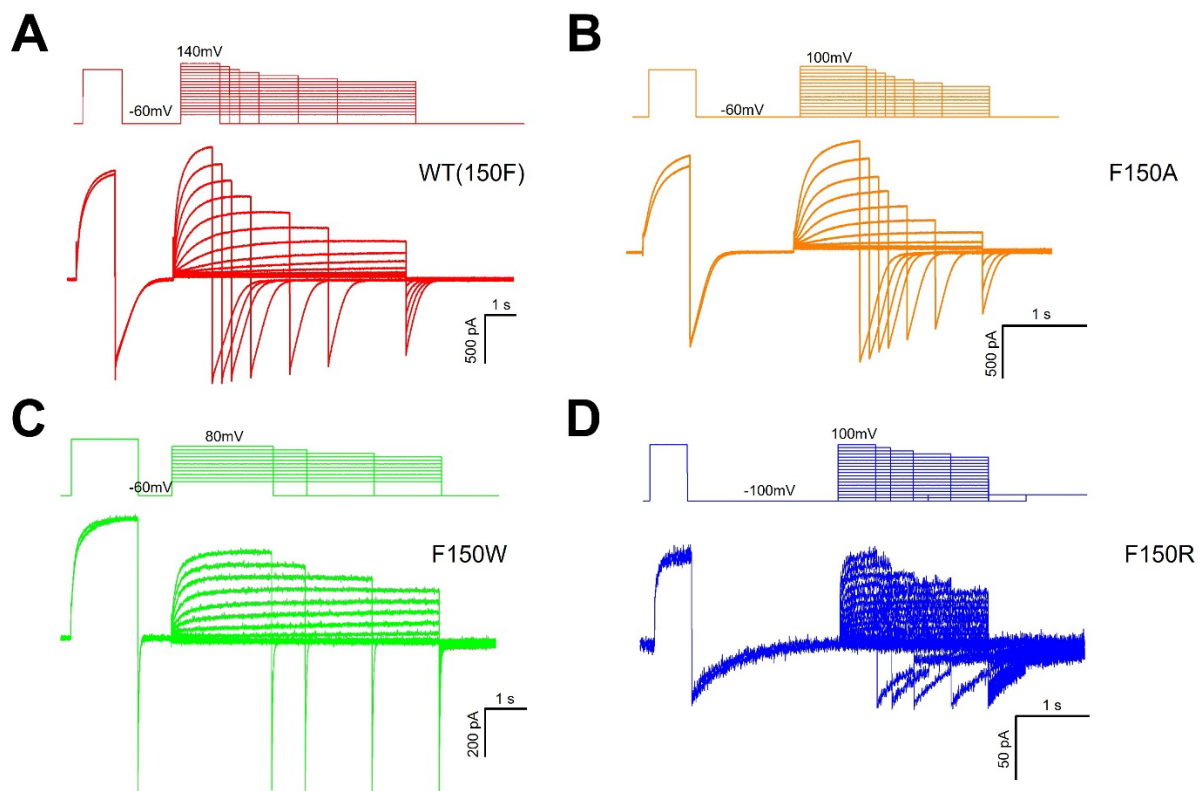

**Figure.S1 hHv1 F150 mutations affect voltage-dependent activation of the channel.** Related to Figure 1. Representative currents were recorded in HEK293 cells expressing WT(150F) (A), F150A (B), F150W (C), or F150R (D),  $pH_i=pH_o=6.0$ . For clarity, only the first and last traces elicited by the depolarization pre-step are shown. The corresponding pulse protocols are shown above the current traces.

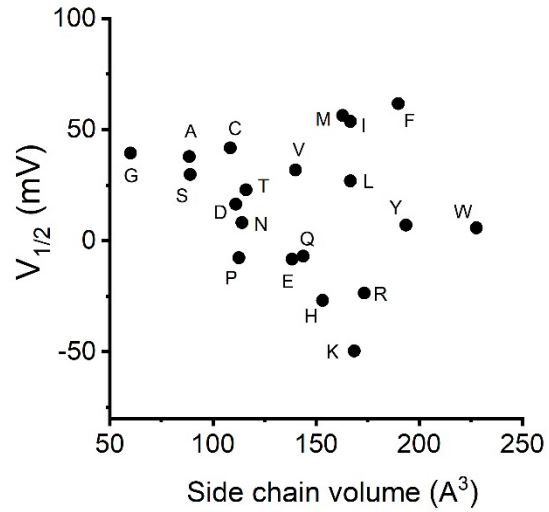

**Figure.S2 The size of side chain does not correlate with H<sub>v</sub>1 voltage-dependent activation.** Related to Figure 1. The V<sub>1/2</sub> values obtained from G-V curves are plotted with size of the substituted side chain at position F150. There were no significant correlations between the size of side chain and the V<sub>1/2</sub> values.

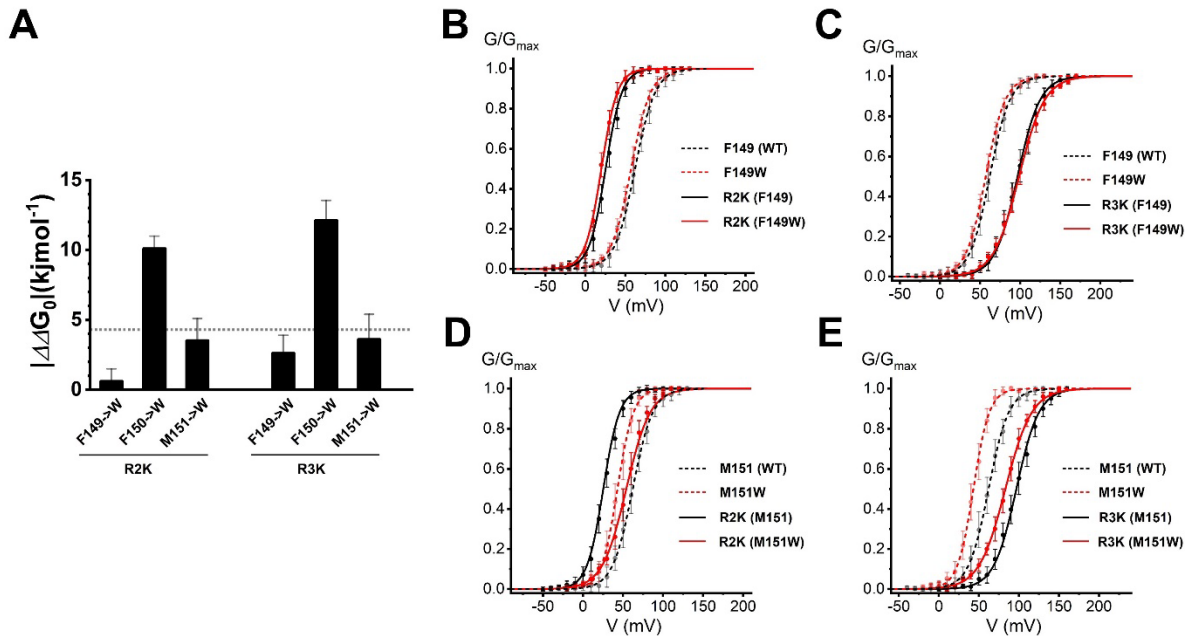

**Figure. S3 F149 and M151 do not interact with R2 and R3 during the channel activation.** Related to Figure 2. **A.** Summary of  $|\Delta\Delta G_0|$  determined by the double mutant cycle analysis. A significant interaction between two residues was defined as a  $|\Delta\Delta G_0| > 4.2$  kJ/mol (dot line). **B-E.** Effects of mutations on the  $G$ - $V$  relationship of the channels. Voltage-dependent channel activations were shown for R2K with F149 (R2K(F149)) and R2K with F149W (R2K(F149W)) (**B**), R3K(F149) and R3K(F149W) (**C**), R2K(M151) and R2K(M151W) (**E**), and R3K(M151) and R3K(M151W) (**F**). In **B-C**, the dash line (black) represented  $G$ - $V$  curve of WT channel (F149), and the dash line (red) represented  $G$ - $V$  curve of F149W. In **D-E**, the dash line (black) represented  $G$ - $V$  curve of WT channel (M151), and the dash line (red) represented  $G$ - $V$  curve of M151W. Lines indicate fits of the data to a *Boltzmann* function. Proton currents were recorded in HEK293 cells expressing H<sub>v</sub>1 mutations,  $pH_i = pH_o = 6.0$ . Data are represented as mean  $\pm$  SEM.

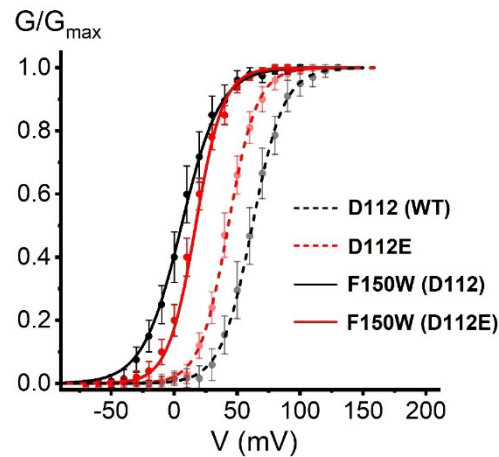

**Figure. S4 Double mutant cycle analysis indicates F150 interacts with D112E.**

Related to Figure 2. Voltage-dependent channel activations were shown for F150W with D112 (F150W(D112)) and F150W with D112E (F150W (D112E)), the dash line (black) represented  $G$ - $V$  curve of WT channel (D112), and the dash line (red) represented  $G$ - $V$  curve of D112E. The combination F150W-D112E had  $|\Delta\Delta G_0|$  value (6.0 kJ/mol) larger than 4.2 kJ/mol, indicating a thermodynamic coupling between F150 and D112. Lines indicate fits of the data to a *Boltzmann* function. Proton currents were recorded in HEK293 cells expressing  $H_v1$  mutations,  $pH_i=pH_o=6.0$ . Data are represented as mean  $\pm$  SEM.

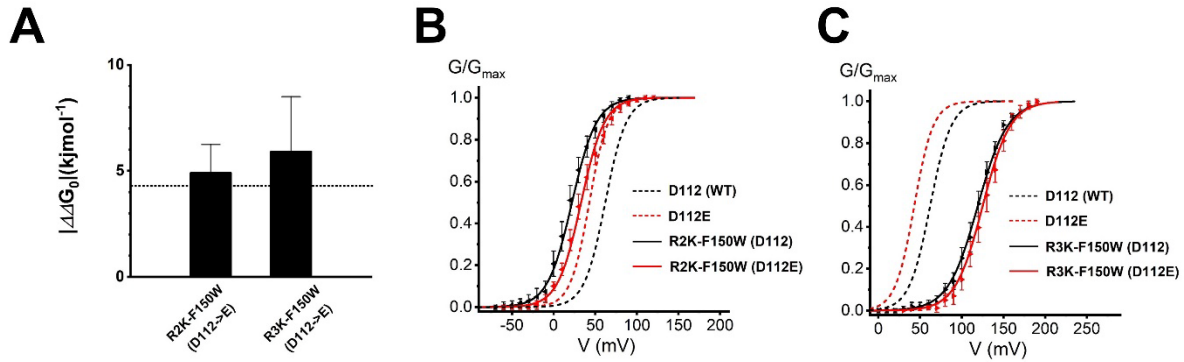

**Figure.S5 Effects of D112E on the interactions between F150 and R2/R3.** Related to Figure 2. **A.** Summary of  $|\Delta\Delta G_0|$  determined by the double mutant cycle analysis. A significant interaction between two residues was defined as a  $|\Delta\Delta G_0| > 4.2$  kJ/mol (dot line). **B-C.** Voltage-dependent channel activations were shown for R2K-F150W with D112 (R2K-F150W(D112)) and R2K-F150W with D112E (R2K-F150W (D112E)) (**B**), R3K-F150W with D112 (R3K-F150W(D112)) and R3K-F150W with D112E (R3K-F150W (D112E)) (**C**). In **B-C**, the dash line (black) represented  $G$ - $V$  curve of WT channel (D112), and the dash line (red) represented  $G$ - $V$  curve of D112E. Lines indicate fits of the data to a *Boltzmann* function. Proton currents were recorded in HEK293 cells expressing Hv1 mutations,  $pH_i = pH_o = 6.0$ . Data are represented as mean  $\pm$  SEM.

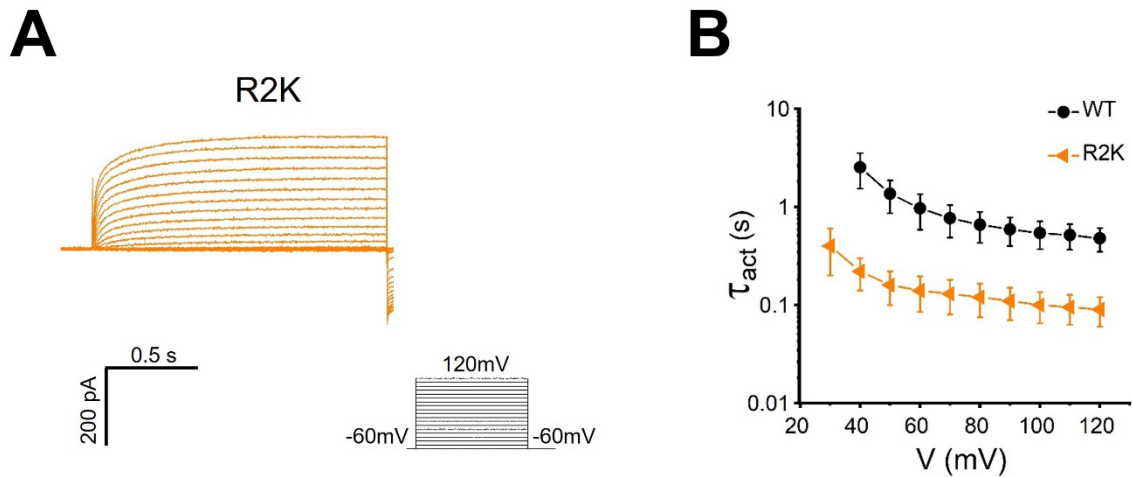

**Figure.S6 Effects of R2K on the activation kinetics of the channel.** Related to Figure 3. **A.** Representative rising currents recorded from R2K. Currents were measured from a holding potential of -60 mV to test potentials ranging between -60 and +120 mV in 10 mV steps. **B.** The channel opening time constant  $\tau_{act}$  in WT or R2K mutation.  $\tau_{act}$  was obtained from *exponential* fit to rising currents. Proton currents were recorded in HEK293 cells expressing Hv1 mutations,  $pH_i=pH_o=6.0$ . Data are represented as mean  $\pm$  SEM.



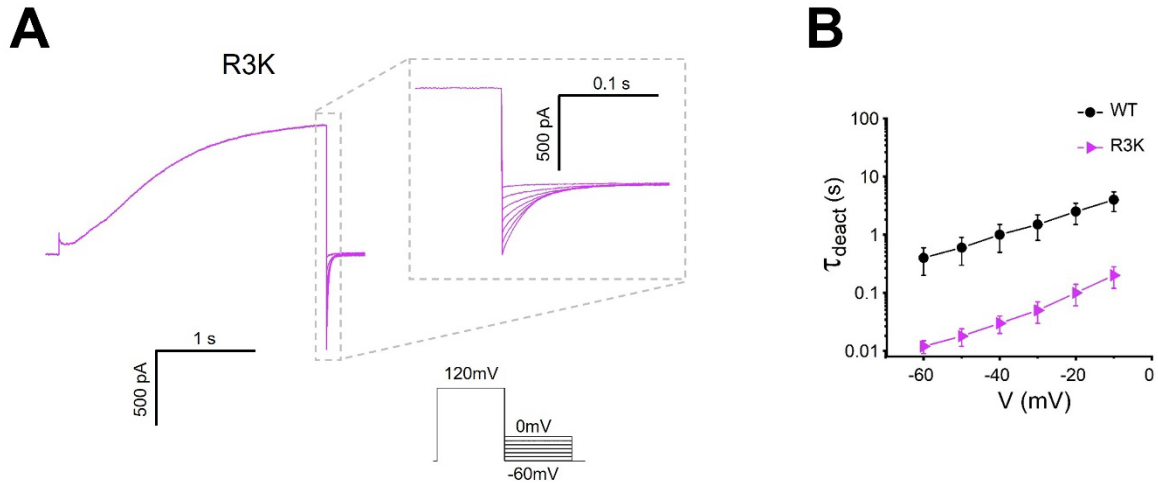

**Figure.S7 Effects of R3K on the deactivation kinetics of the channel.** Related to Figure 4. **A.** Representative tail currents recorded from R3K. The tail currents were elicited by a prepulse to 120 mV, in 10 mV decrements from 0 to -60 mV. The dotted line box represents the zoomed area. **B.** The deactivation (channel closing) time constant  $\tau_{\text{deact}}$  in WT or R3K mutation.  $\tau_{\text{deact}}$  was obtained from *exponential* fit to tail currents. Proton currents were recorded in HEK293 cells expressing Hv1 mutations,  $\text{pH}_i=\text{pH}_o=6.0$ . Data are represented as mean  $\pm$  SEM.

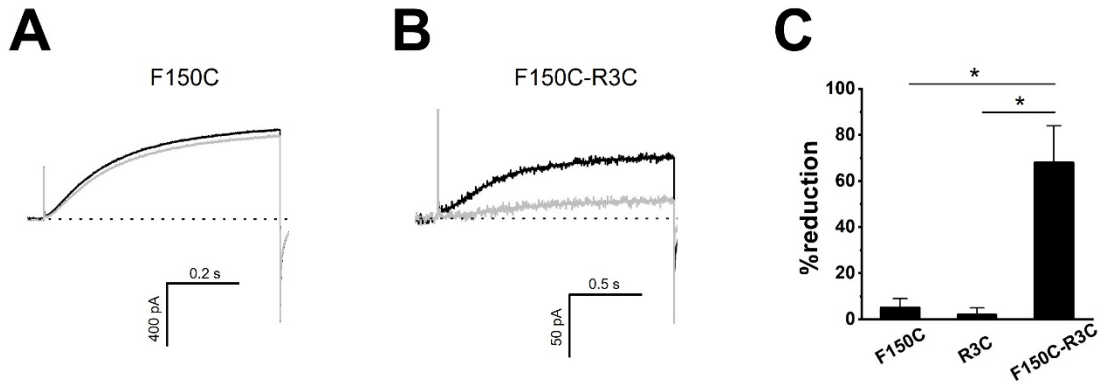

**Figure.S8 Cysteine cross linking analysis for positions F150 and R3.** Related to Figure 4. **A-B.** Representative proton currents measured in an inside-out patch from a *Xenopus* oocyte expressing Hv1 F150C (**A**) or F150C-R3C (**B**) before (black traces) and after (gray traces) addition 2  $\mu$ M Cd<sup>2+</sup> in the bath solution, pHi=pHo=6.0. Currents were measured from a holding potential of -60 mV to the test potential of +120 mV in inside-out patch configuration. The dash lines represent 0 pA. **C.** Summary of reduction of proton current produced by Cd<sup>2+</sup>. Data are represented as mean  $\pm$  SEM. \* $p < 0.05$ , paired, two-tailed Student's t test.

**Table.S1 Effects of F150 mutations on the voltage-dependent activation of H<sub>v</sub>1 channels.** Related to Figure 1.

| <b>Channel</b> | <b><i>n</i></b> | <b><i>V</i><sub>1/2</sub>(mV)</b> | <b><i>k</i>(mV)</b> |
|----------------|-----------------|-----------------------------------|---------------------|
| F150A          | 6               | 37.9±3.5                          | 10.9±0.6            |
| F150C          | 8               | 41.8±3.6                          | 12.1±0.7            |
| F150D          | 5               | 16.4±5.1                          | 14.0±0.7            |
| F150E          | 6               | -8.3±3.5                          | 14.5±0.8            |
| 150F(WT)       | 10              | 61.7±2.7                          | 11.6±0.4            |
| F150G          | 8               | 39.4±3.1                          | 13.6±0.7            |
| F150H          | 8               | -26.9±3.4                         | 10.7±0.5            |
| F150I          | 6               | 53.7±3.3                          | 11.9±0.6            |
| F150K          | 5               | -49.7±4.6                         | 10.1±0.9            |
| F150L          | 4               | 26.9±3.6                          | 12.3±0.6            |
| F150M          | 6               | 56.3±3.2                          | 11.4±0.5            |
| F150N          | 5               | 8.1±3.1                           | 12.7±0.7            |
| F150P          | 6               | -7.7±4.2                          | 13.1±0.7            |
| F150Q          | 8               | -6.9±3.4                          | 11.1±0.5            |
| F150R          | 4               | -23.6±5.2                         | 11.6±0.8            |
| F150S          | 8               | 29.8±2.5                          | 13.2±0.7            |
| F150T          | 8               | 22.9±2.7                          | 15.6±0.8            |
| F150V          | 6               | 31.8±3.2                          | 11.1±0.7            |
| F150W          | 9               | 5.8±3.2                           | 13.4±0.9            |
| F150Y          | 5               | 7.0±3.2                           | 10.7±0.6            |

*V*<sub>1/2</sub> and *k* values were derived from the *Boltzmann* fit and obtained from fitting conductance versus voltage (*G-V*) relations. Values shown as mean ± SEM.

**Table.S2 The physicochemical properties of amino acids including hydrophobicity and side chain volume. Related to Figure 1.**

| <i>Amino acid at position 150</i> | <i>Hydrophobicity (Kyte-Doolittle)</i> | <i>Hydrophobicity (Goldman-Engelman-Steitz)</i> | <i>Side chain volume (Å<sup>3</sup>)</i> |
|-----------------------------------|----------------------------------------|-------------------------------------------------|------------------------------------------|
| A                                 | 1.8                                    | 1.6                                             | 88.6                                     |
| C                                 | 2.5                                    | 2.0                                             | 108.5                                    |
| D                                 | -3.5                                   | -9.2                                            | 111.1                                    |
| E                                 | -3.5                                   | -8.2                                            | 138.4                                    |
| F                                 | 2.8                                    | 3.7                                             | 189.9                                    |
| G                                 | -0.4                                   | 1.0                                             | 60.1                                     |
| H                                 | -3.2                                   | -3.0                                            | 153.2                                    |
| I                                 | 4.5                                    | 3.1                                             | 166.7                                    |
| K                                 | -3.9                                   | -8.8                                            | 168.6                                    |
| L                                 | 3.8                                    | 2.8                                             | 166.7                                    |
| M                                 | 1.9                                    | 3.4                                             | 162.9                                    |
| N                                 | -3.5                                   | -4.8                                            | 114.1                                    |
| P                                 | -1.6                                   | -0.2                                            | 112.7                                    |
| Q                                 | -3.5                                   | -4.1                                            | 143.8                                    |
| R                                 | -4.5                                   | -12.3                                           | 173.4                                    |
| S                                 | -0.8                                   | 0.6                                             | 89.0                                     |
| T                                 | -0.7                                   | 1.2                                             | 116.1                                    |
| V                                 | 4.2                                    | 2.6                                             | 140.0                                    |
| W                                 | -0.9                                   | 1.9                                             | 227.8                                    |
| Y                                 | -1.3                                   | -0.7                                            | 193.6                                    |

**Table.S3 Effects of mutations in S2 and S4 segments on the voltage-dependent activation of Hv1 channels. Related to Figures 1-2.**

| <i>Channel</i>  | <i>n</i> | <i>V</i> <sub>1/2</sub> (mV) | <i>k</i> (mV) | $\Delta G_0$ (kJmol <sup>-1</sup> ) | $ \Delta\Delta G_0 $ (kJmol <sup>-1</sup> ) |
|-----------------|----------|------------------------------|---------------|-------------------------------------|---------------------------------------------|
| WT              | 10       | 61.7±2.7                     | 11.6±0.4      | 13.1±0.3                            | <i>n/a</i>                                  |
| R1K             | 6        | 117.2±3.4                    | 14.3±1.3      | 20.8±1.2                            | <i>n/a</i>                                  |
| R2K             | 6        | 25.3±4.0                     | 10.2±1.0      | 6.1±0.4                             | <i>n/a</i>                                  |
| R3K             | 8        | 96.6±5.1                     | 14.1±1.0      | 17.2±0.6                            | <i>n/a</i>                                  |
| N4K             | 6        | 52.7±2.3                     | 8.0±0.9       | 17.1±1.5                            | <i>n/a</i>                                  |
| F150W           | 9        | 5.8±3.2                      | 13.4±0.9      | 0.8±0.5                             | <i>n/a</i>                                  |
| F150W-R1K       | 7        | 78.9±4.7                     | 17.6±0.9      | 11.1±0.3                            | 2.7±1.4                                     |
| F150W-R2K       | 7        | 22.1±2.1                     | 14.7±1.1      | 3.8±0.4                             | 10.1±0.9                                    |
| F150W-R3K       | 6        | 119.2±3.2                    | 17.8±1.2      | 17.0±1.2                            | 12.1±1.5                                    |
| F150W-N4K       | 6        | 6.8±2.3                      | 8.3±1.0       | 2.6±1.0                             | 2.2±1.8                                     |
| D112E           | 8        | 43.3±3.6                     | 10.8±0.6      | 10.3±1.1                            | <i>n/a</i>                                  |
| D112E-F150W     | 6        | 15.8±2.6                     | 10.7±0.7      | 3.9±0.9                             | 6.0±1.6                                     |
| D112E-F150W-R2K | 6        | 31.7±0.9                     | 14.0±1.0      | 5.8±0.6                             | 4.9±1.4                                     |
| D112E-F150W-R3K | 6        | 125.0±3.0                    | 16.3±1.4      | 19.8±2.2                            | 5.8±2.6                                     |
| F149W           | 6        | 57.5±2.1                     | 12.3±0.4      | 11.6±0.6                            | <i>n/a</i>                                  |
| F149W-R2K       | 5        | 18.8±1.5                     | 9.2±0.7       | 5.1±0.4                             | 0.6±0.9                                     |
| F149W-R3K       | 5        | 98.6±4.9                     | 18.8±1.2      | 13.1±0.9                            | 2.6±1.3                                     |
| M151W           | 6        | 44.2±3.5                     | 9.7±0.6       | 11.7±1.5                            | <i>n/a</i>                                  |
| M151W-R2K       | 4        | 54.0±3.1                     | 16.5±0.6      | 8.1±0.4                             | 3.5±1.6                                     |
| M151W-R3K       | 4        | 83.3±4.3                     | 17.0±0.7      | 12.2±0.9                            | 3.6±1.8                                     |

*V*<sub>1/2</sub> and *k* values were derived from the *Boltzmann* fit and obtained from fitting *G-V* relations. Values shown as mean ± SEM.  $\Delta G_0$  and  $|\Delta\Delta G_0|$  were determined by the equations shown in the methods. *n/a*, not applicable.

**Table S4. List of primers used for mutagenesis.** Related to STAR Methods.

| <b>Constructs</b> | <b>Type</b> | <b>Primer Sequences (5' to 3')</b>           |
|-------------------|-------------|----------------------------------------------|
| F150A             | Forward     | GAGCATCACCATCTTGGTCTTTGCTATGATGGAGATCATC     |
|                   | Reverse     | GATGATCTCCATCATAGCAAAGACCAAGATGGTGTATGCTC    |
| F150C             | Forward     | GCATCACCATCTTGGTCTTTTGTATGATGGAGATCATC       |
|                   | Reverse     | GATGATCTCCATCATACAAAAGACCAAGATGGTGTATGC      |
| F150D             | Forward     | CATGAGCATCACCATCTTGGTCTTTGATATGATGGAGATCATC  |
|                   | Reverse     | GATGATCTCCATCATATCAAAGACCAAGATGGTGTATGCTCATG |
| F150E             | Forward     | CATGAGCATCACCATCTTGGTCTTTGAGATGATGGAGATCATC  |
|                   | Reverse     | GATGATCTCCATCATCTCAAAGACCAAGATGGTGTATGCTCATG |
| F150G             | Forward     | GAGCATCACCATCTTGGTCTTTGGTATGATGGAGATCATC     |
|                   | Reverse     | GATGATCTCCATCATACCAAAGACCAAGATGGTGTATGCTC    |
| F150H             | Forward     | CATGAGCATCACCATCTTGGTCTTTCATATGATGGAGATCATC  |
|                   | Reverse     | GATGATCTCCATCATATGAAAGACCAAGATGGTGTATGCTCATG |
| F150I             | Forward     | GAGCATCACCATCTTGGTCTTTATTATGATGGAGATCATC     |
|                   | Reverse     | GATGATCTCCATCATAATAAAGACCAAGATGGTGTATGCTC    |
| F150K             | Forward     | CATGAGCATCACCATCTTGGTCTTTAAGATGATGGAGATCATC  |
|                   | Reverse     | GATGATCTCCATCATCTTAAAGACCAAGATGGTGTATGCTCATG |
| F150L             | Forward     | GCATCACCATCTTGGTCTTTTTGATGATGGAGATCATC       |
|                   | Reverse     | GATGATCTCCATCATCAAAAAGACCAAGATGGTGTATGC      |
| F150M             | Forward     | CATGAGCATCACCATCTTGGTCTTTATGATGATGGAGATCATC  |
|                   | Reverse     | GATGATCTCCATCATCATAAAGACCAAGATGGTGTATGCTCATG |
| F150N             | Forward     | CATGAGCATCACCATCTTGGTCTTTAATATGATGGAGATCATC  |
|                   | Reverse     | GATGATCTCCATCATATTAAGACCAAGATGGTGTATGCTCATG  |
| F150P             | Forward     | GAGCATCACCATCTTGGTCTTTCCTATGATGGAGATCATC     |
|                   | Reverse     | GATGATCTCCATCATAGGAAAGACCAAGATGGTGTATGCTC    |
| F150Q             | Forward     | CATGAGCATCACCATCTTGGTCTTTCAGATGATGGAGATCATC  |
|                   | Reverse     | GATGATCTCCATCATCTGAAAGACCAAGATGGTGTATGCTCATG |
| F150R             | Forward     | CATGAGCATCACCATCTTGGTCTTTAGGATGATGGAGATCATC  |

|             |         |                                             |
|-------------|---------|---------------------------------------------|
|             | Reverse | GATGATCTCCATCATCCTAAAGACCAAGATGGTGATGCTCATG |
| F150S       | Forward | CATGAGCATCACCATCTTGGTCTTTAGTATGATGGAGATCATC |
|             | Reverse | GATGATCTCCATCATACTAAAGACCAAGATGGTGATGCTCATG |
| F150T       | Forward | CATGAGCATCACCATCTTGGTCTTTACTATGATGGAGATCATC |
|             | Reverse | GATGATCTCCATCATAGTAAAGACCAAGATGGTGATGCTCATG |
| F150V       | Forward | GCATCACCATCTTGGTCTTTGTTATGATGGAGATCATC      |
|             | Reverse | GATGATCTCCATCATAACAAAGACCAAGATGGTGATGC      |
| F150W       | Forward | GAGCATCACCATCTTGGTCTTTTGGATGATGGAGATCATC    |
|             | Reverse | GATGATCTCCATCATCCAAAAGACCAAGATGGTGATGCTC    |
| F150Y       | Forward | GAGCATCACCATCTTGGTCTTTTATATGATGGAGATCATC    |
|             | Reverse | GATGATCTCCATCATATAAAAGACCAAGATGGTGATGCTC    |
| R1K (R205K) | Forward | CCTGCTGATTCTGCTCAAGCTGTGGCGGGTG             |
|             | Reverse | CACCCGCCACAGCTTGAGCAGAATCAGCAGG             |
| R2K (R208K) | Forward | CTCCGGCTGTGGAAGGTGGCCCGGATC                 |
|             | Reverse | GATCCGGGCCACCTTCCACAGCCGGAG                 |
| R3K (R211K) | Forward | GCTGTGGCGGGTGGCCAAGATCATCAATGGG             |
|             | Reverse | CCCATTGATGATCTTGGCCACCCGCCACAGC             |
| N4K (N214K) | Forward | GTGGCCCGGATCATCAAAGGGATTATCATCTC            |
|             | Reverse | GAGATGATAATCCCTTTGATGATCCGGGCCAC            |
| R3C (R211C) | Forward | CTGTGGCGGGTGGCCTGCATCATCAATGGG              |
|             | Reverse | CCCATTGATGATGCAGGCCACCCGCCACAG              |
| D112E       | Forward | GGTTCTGGAAGCCCTCCTGGTGCTTGCTG               |
|             | Reverse | GAGGGCTTCCAGAACCACCAAGCAGATGATG             |
| F149W       | Forward | CTTGGTCTGGTTTATGATGGAGATCATCTTTAAATTATTG    |
|             | Reverse | CCATCATAAACCAGACCAAGATGGTGATGCTCATG         |
| M151W       | Forward | CTTTTTTTGGATGGAGATCATCTTTAAATTATTGTC        |
|             | Reverse | GATCTCCATCCAAAAAAGACCAAGATGGTGATGCTC        |
